# Supplementary material
Source: publisher figshare collection journal article supplement (https://acs.figshare.com/ndownloader/files/21731898)
Supplement: Supplementary file 1 [file 21731898]

## Supporting Information

### Understanding the Morphology of High-performance Solar Cells Based on a Low Cost Polymer Donor

Zhengqing Xu, <sup>†,∇</sup> Fei Pan, <sup>‡,§,∇</sup> Chenkai Sun, <sup>‡,§</sup> Song Hong, <sup>†</sup> Shanshan Chen, <sup>⊥, #</sup>  
Changduk Yang, <sup>#</sup> Zhiguo Zhang, <sup>‡,§</sup> Yao Liu, <sup>†</sup> Thomas P. Russell, <sup>||,†</sup> Yongfang Li <sup>\*,‡,§</sup>  
and Dong Wang <sup>\*,†</sup>

<sup>†</sup>Beijing Advanced Innovation Center for Soft Matter Science and Engineering & State Key Laboratory of Organic-Inorganic Composites, Beijing University of Chemical Technology, Beijing 100029, China.

<sup>‡</sup>Beijing National Laboratory for Molecular Sciences, CAS Key Laboratory of Organic Solids, Institute of Chemistry, Chinese Academy of Sciences, Beijing 100190, China.

<sup>§</sup>School of Chemical Sciences, University of Chinese Academy of Sciences, Beijing 100049, China

<sup>⊥</sup>MOE Key Laboratory of Low-grade Energy Utilization Technologies and Systems, CQU-NUS Renewable Energy Materials & Devices Joint Laboratory, School of Energy & Power Engineering, Chongqing University, Chongqing 400044, China

<sup>#</sup>Department of Energy Engineering, School of Energy and Chemical Engineering, Low Dimensional Carbon Materials Center, Ulsan National Institute of Science and Technology (UNIST), Ulsan 689-798, South Korea

<sup>||</sup>Polymer Science and Engineering Department, University of Massachusetts Amherst, Massachusetts 01003, United States

<sup>||</sup>Materials Sciences Division, Lawrence Berkeley National Laboratory, 1 Cyclotron Road, Berkeley, California 94720, United States

#### Corresponding Author

\*E-mail: liyf@iccas.ac.cn

\*E-mail: dwang@mail.buct.edu.cn

**Table S1** Charge transport properties of PTQ10 based devices

| Sample Number <sup>a</sup> | $\mu_h$<br>( $\times 10^{-4} \text{ cm}^2 \text{ V}^{-1} \text{ s}^{-1}$ ) | $\mu_e$<br>( $\times 10^{-4} \text{ cm}^2 \text{ V}^{-1} \text{ s}^{-1}$ ) | $\mu_e/\mu_h$ | Charge dissociation probability <sup>b</sup> |
|----------------------------|----------------------------------------------------------------------------|----------------------------------------------------------------------------|---------------|----------------------------------------------|
| 1                          | 0.381                                                                      | 4.94                                                                       | 13.0          | 96.0%                                        |
| 2                          | 1.53                                                                       | 6.76                                                                       | 4.42          | 98.2%                                        |
| 3                          | 0.178                                                                      | 4.80                                                                       | 27.0          | 95.2%                                        |
| 4                          | 0.840                                                                      | 6.11                                                                       | 7.27          | 95.8%                                        |
| 5                          | 0.956                                                                      | 1.11                                                                       | 1.17          | 87.2%                                        |
| 6                          | 1.13                                                                       | 1.84                                                                       | 1.62          | 97.4%                                        |

<sup>a</sup>Sample numbers that correspond to the devices are the same as that shown in **Table 1** in the main manuscript.

<sup>b</sup>Under the short-circuit conditions.

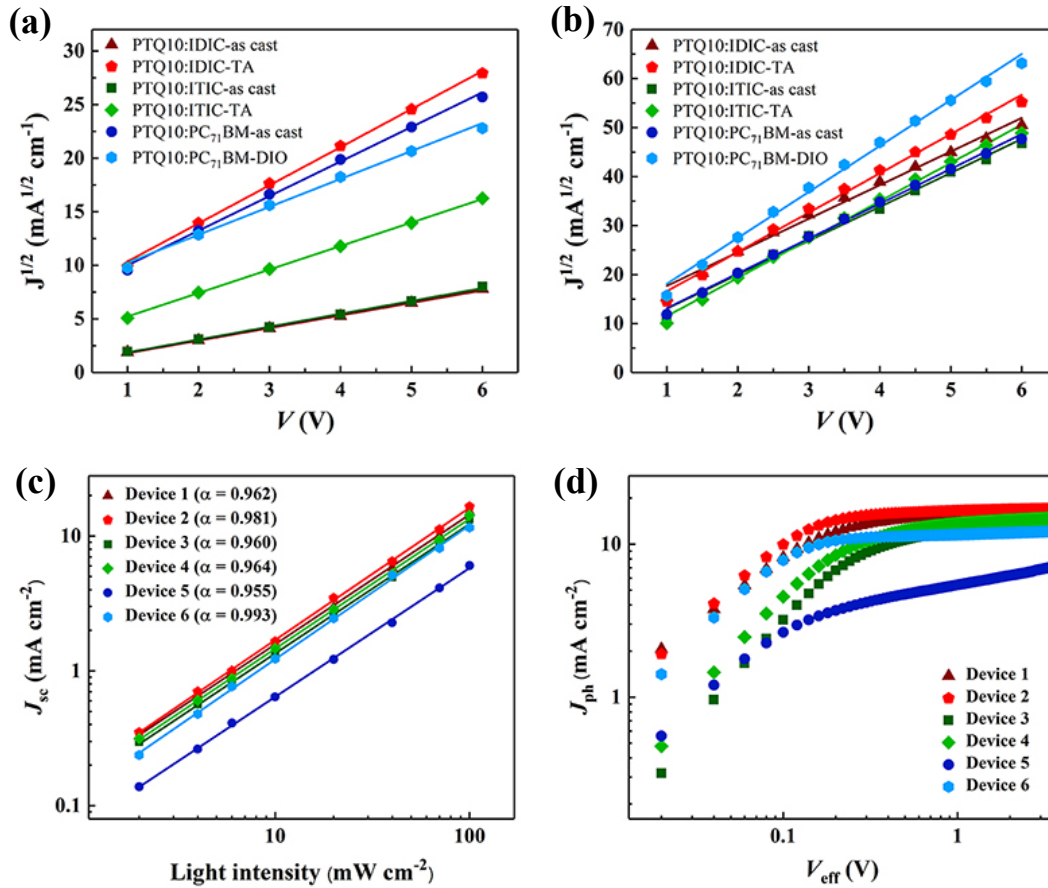

**Figure S1.**  $J^{1/2}$  vs.  $V$  plots of PTQ10 based hole-only devices (a) and electron-only devices (b). (c)  $J_{sc}$  dependence on light intensity and (d)  $J_{ph}$  vs.  $V_{eff}$  plots of PTQ10-based devices.

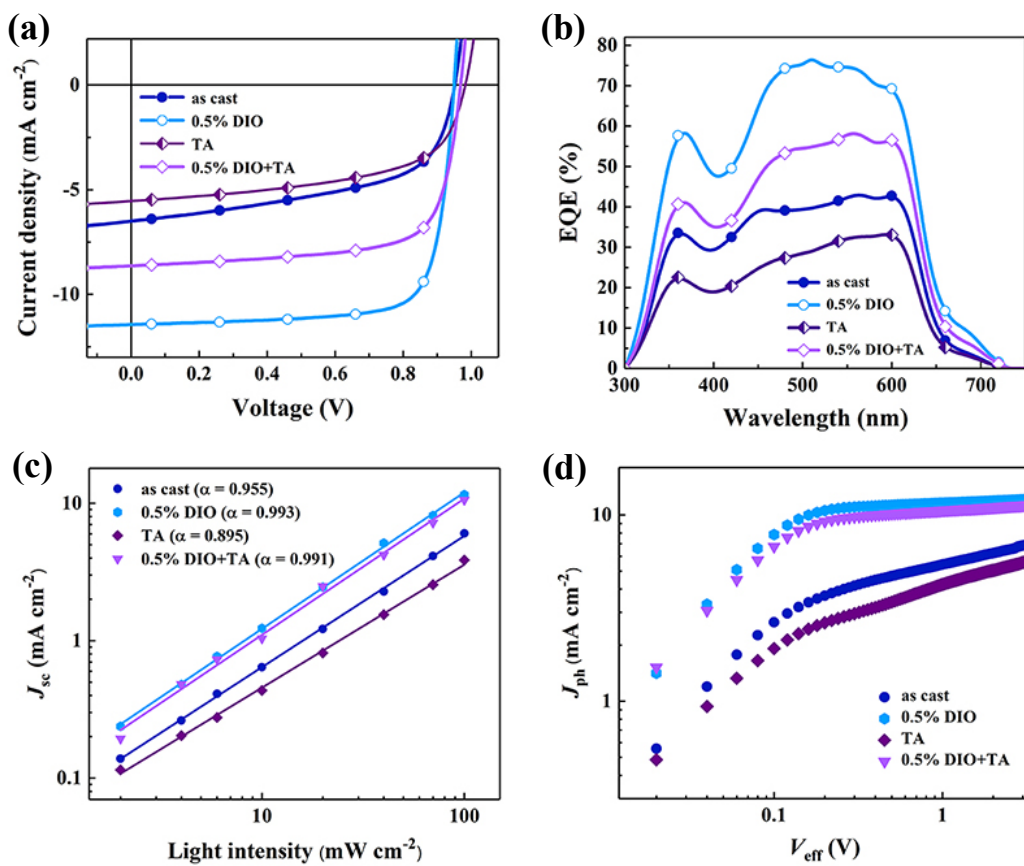

**Figure S2.** (a)  $J$ - $V$  curves, (b) EQE spectra, (c) the dependence of  $J_{sc}$  on light intensity and (d)  $J_{ph}$  versus  $V_{eff}$  plot of PTQ10:PC<sub>71</sub>BM-based devices.

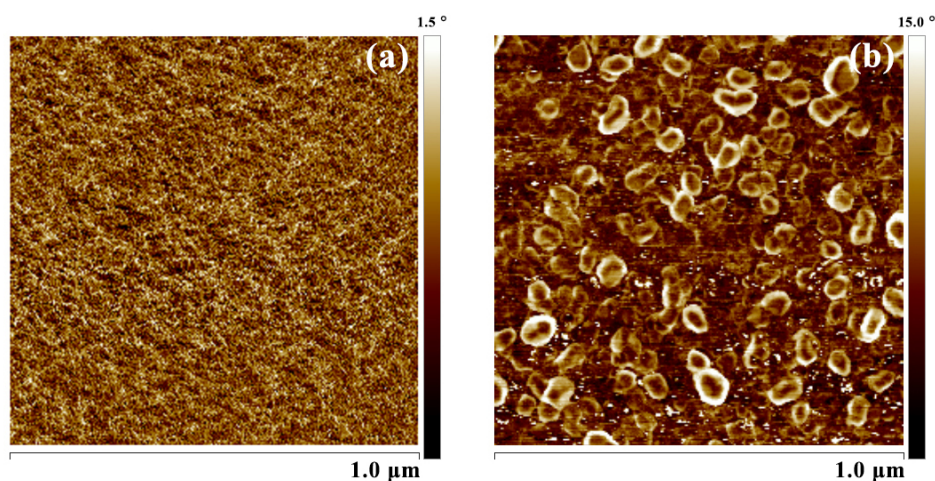

**Figure S3.** AFM phase images of (a) PTQ10:IDIC-as cast films and (b) PTQ10:IDIC-TA films. TA treatments were performed at 140 °C for 5 min.

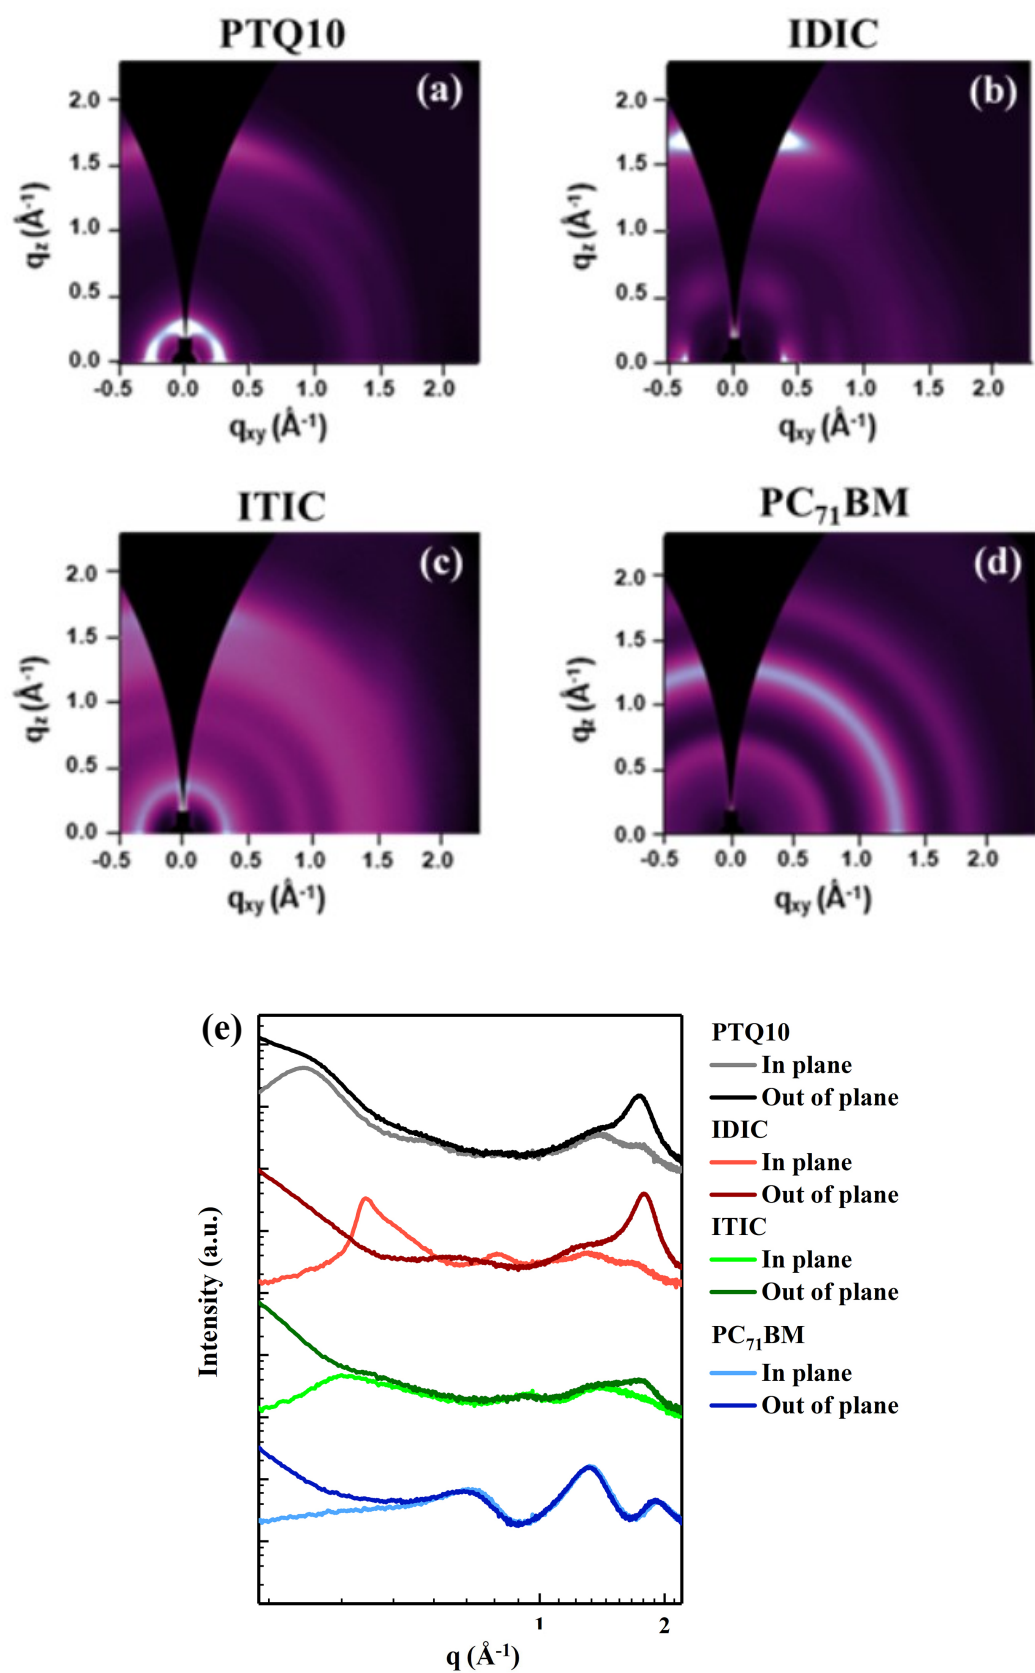

**Figure S4.** GIWAXS images of neat PTQ10 (a), IDIC (b), ITIC (c), and PC<sub>71</sub>BM (d) films and (e) corresponding line cut profiles.

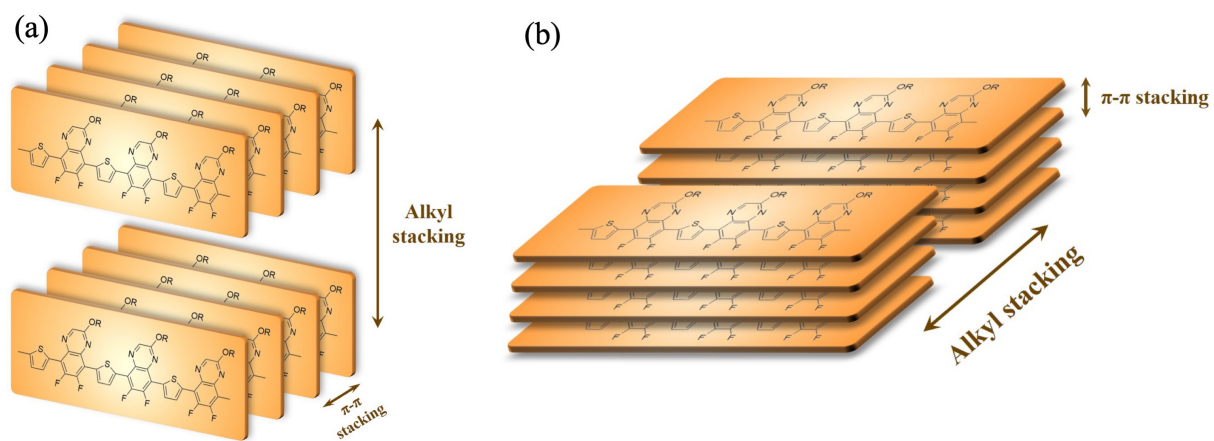

**Figure S5.** Schematic illustration of the PTQ10 crystallite oriented (a) edge-on and (b) face-on.
